# Supplementary material for: New lignin-based polyurethane foam for wastewater treatment
Source: Royal Society of Chemistry journal article supplement (doi:10.1039/c6ra13308h), 2016-01-01
Supplement: c6ra13308h1.pdf [file c6ra13308h1.pdf]

## **New lignin-based polyurethane foam for wastewater treatment**

**Sapana Kumari<sup>a</sup>, Ghanshyam S. Chauhan<sup>\*a</sup>, Sheetal Monga<sup>b</sup>, Anupama Kaushik<sup>b</sup> and Jou-Hyeon Ahn<sup>c</sup>,**

<sup>a</sup>Department of Chemistry, Himachal Pradesh University, Summer Hill, Shimla, Himachal Pradesh, India-171005

E-mail:ghanshyam\_in2000@yahoo.com, ghanshyamschauhan@gmail.com.

Phone No.: +911772830944, FAX: +911772830775

<sup>b</sup>Dr. SS Bhatnagar University Institute of Chemical Engineering and Technology, Panjab University, Chandigarh - 160014, India.

<sup>c</sup>Department of Chemical Engineering and Research Institute for Green Energy Convergence Technology, Gyeongsang National University, 501 Jinju-daero, Jinju 660-701, Republic of Korea

**Table S1** TGA and DTG comparison of lignin and LPUF

| <b>Polymer</b> | <b>TGA</b>                            |                        |                        |                         | <b>DTG</b>              |                         |                         |
|----------------|---------------------------------------|------------------------|------------------------|-------------------------|-------------------------|-------------------------|-------------------------|
|                | <b>Decomposition Temperature (°C)</b> |                        |                        |                         |                         |                         |                         |
|                | <b>T<sub>10%</sub></b>                | <b>T<sub>25%</sub></b> | <b>T<sub>50%</sub></b> | <b>T<sub>100%</sub></b> | <b>T<sub>1stD</sub></b> | <b>T<sub>2ndD</sub></b> | <b>T<sub>3rdD</sub></b> |
| <b>Lignin</b>  | 210                                   | 272                    | 368                    | 600                     | 245                     | 314                     | 500                     |
| <b>LPUF</b>    | 220                                   | 310                    | 515                    | 700                     | 242                     | 320                     | 565                     |

**Table S2** Parameters of different kinetic models for MG removal by LPUF

| <b>Kinetic Model</b>     | <b>Parameter</b> |                       |
|--------------------------|------------------|-----------------------|
| Pseudo-first-order       | $k_1$            | $3.67 \times 10^{-2}$ |
|                          | $q_e$            | 58.38                 |
|                          | $R^2$            | 0.911                 |
| Pseudo-second-order      | $k_2$            | $4.4 \times 10^{-4}$  |
|                          | $q_e$            | 46.59                 |
|                          | $R^2$            | 0.987                 |
| Elovich model            | $\alpha$         | 2.08                  |
|                          | $\beta$          | 0.103                 |
|                          | $R^2$            | 0.969                 |
| Intra-particle diffusion | $C_i$            | 0.846                 |
|                          | $k_i$            | 2.77                  |
|                          | $R^2$            | 0.912                 |

**Table S3** Thermodynamic parameters for MG removal by LPUF

|      | $\Delta G^\circ$<br>(kJ/mol) |       |       |       |       | $\Delta H^\circ$<br>(kJ/mol) | $\Delta S^\circ$<br>(J/mol K) |
|------|------------------------------|-------|-------|-------|-------|------------------------------|-------------------------------|
| T(K) | 298                          | 308   | 318   | 328   | 338   |                              |                               |
|      | -2.36                        | -2.97 | -3.90 | -3.61 | -3.55 | 6.82                         | 31.77                         |

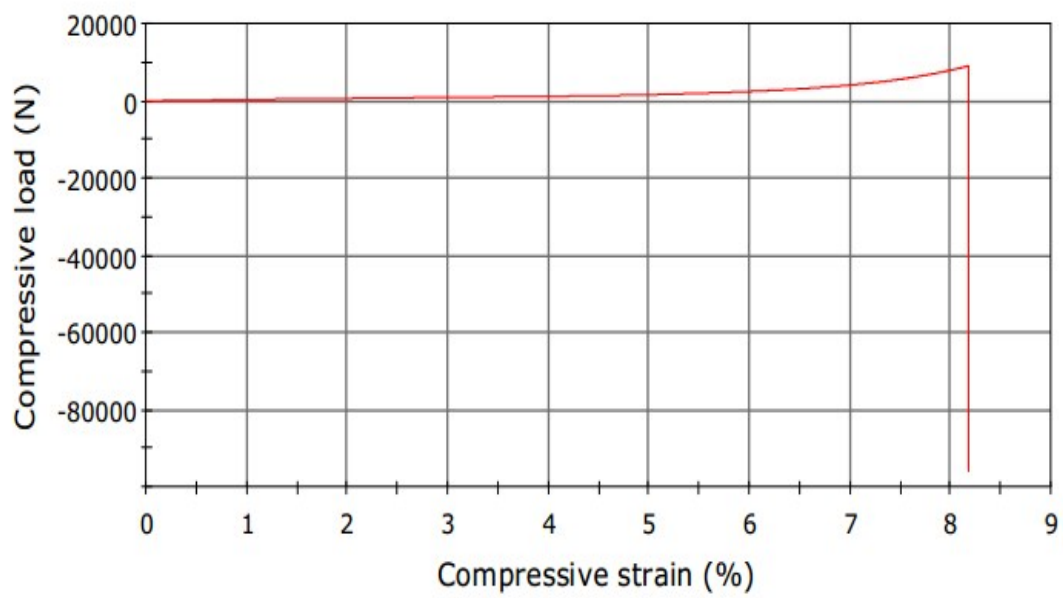

**Fig. S1** Compressive load versus compression strain curve for LPUF.

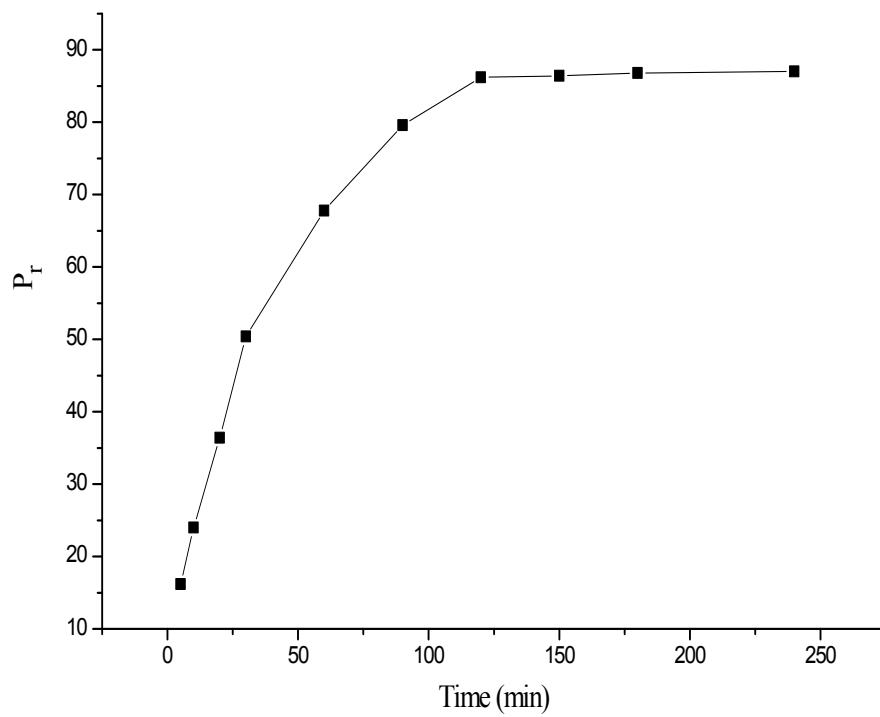

**Fig. S2** %Removal of MG by reference foam (CNW-PUF) with time.

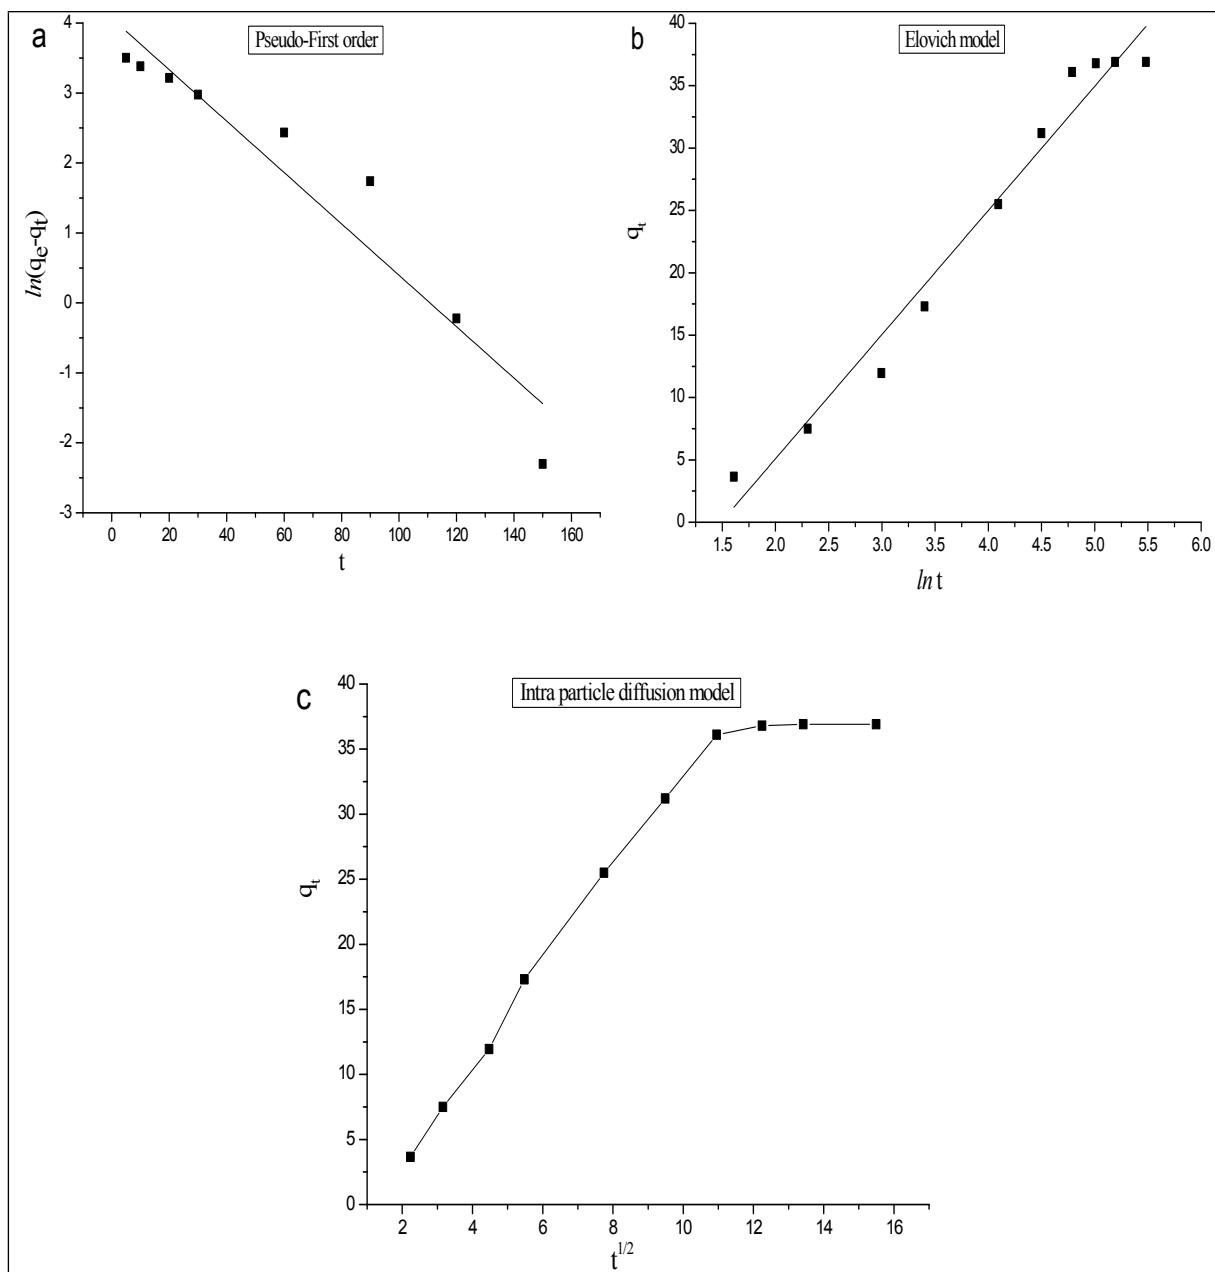

**Fig. S3** Pseudo-first order kinetic plot (a), Elovich model (b) and Intra-particle diffusion model (c) for MG adsorption on LPUF.

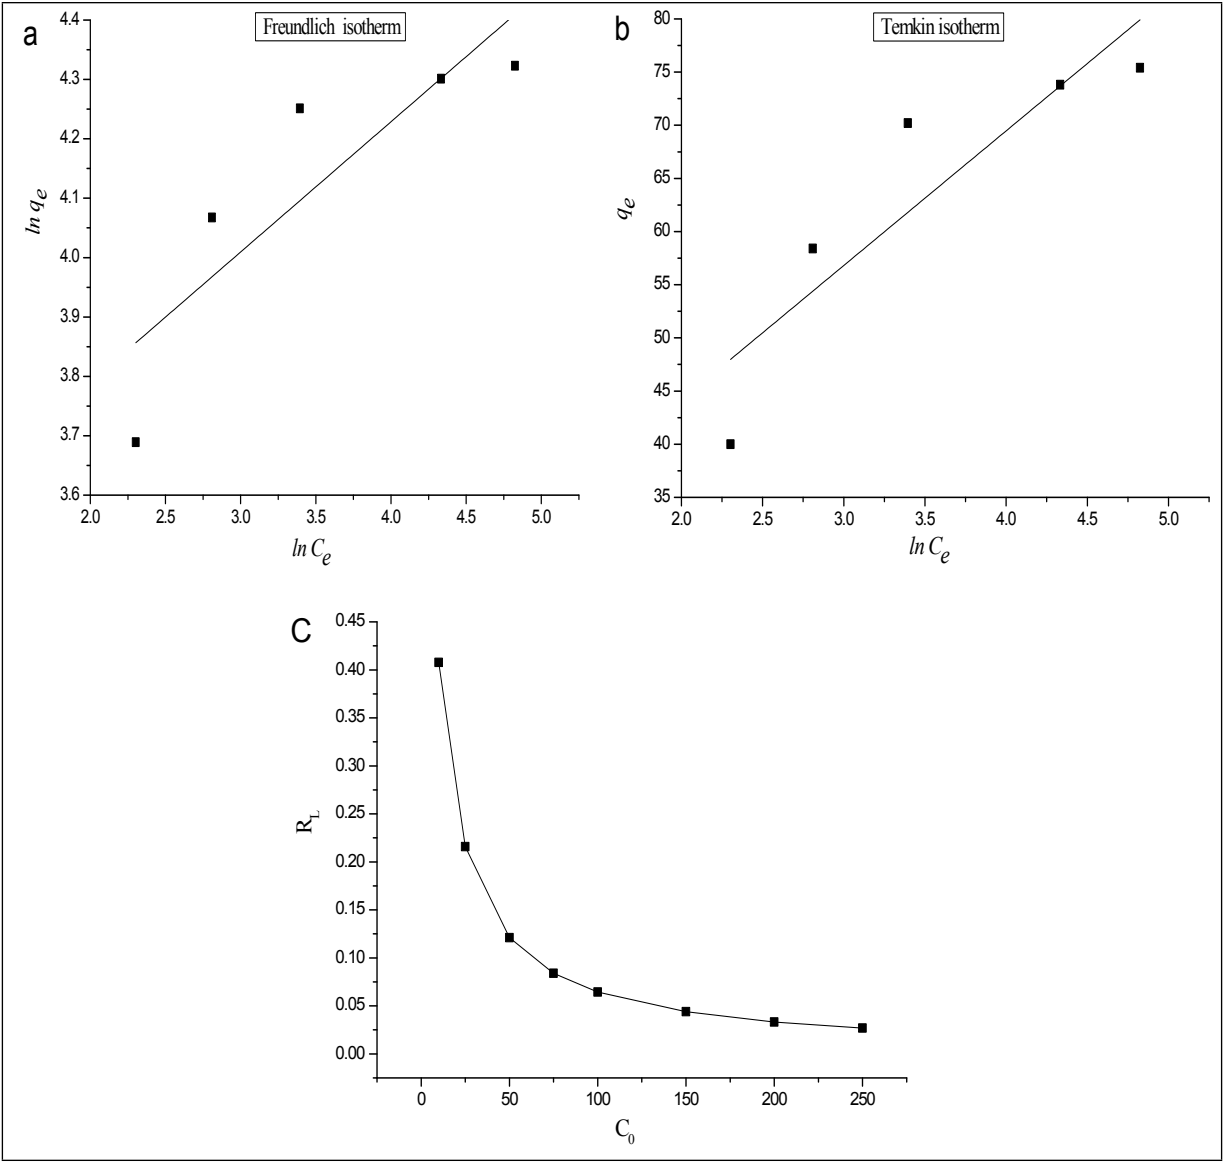

**Fig. S4** Freundlich isotherm (a), Temkin isotherm (b) and plot of  $R_L$  with initial concentration (c) for MG adsorption onto LPUF.
